# Supplementary material for: Ganglioside GD1a enhances osteogenesis by activating ERK1/2 in mesenchymal stem cells of Lmna mutant mice
Source: publisher site journal article supplement (doi:10.18632/aging.204378), 2022-11-14
Supplement: Supplementary file [file aging-v14i23-204378-supplementary-material-SD1.pdf]

## SUPPLEMENTARY FIGURE

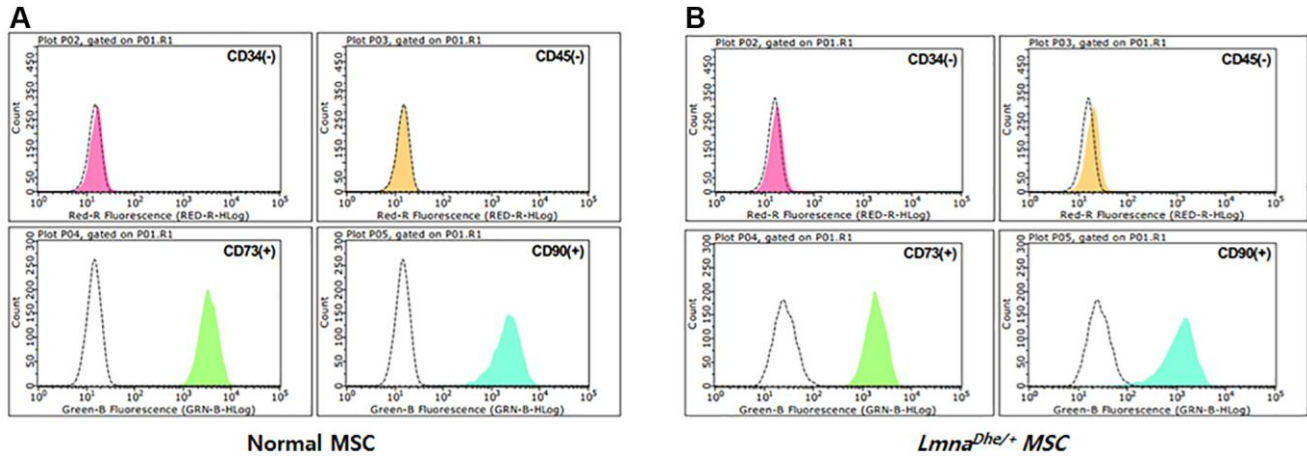

**Supplementary Figure 1. Characterization of BMMSCs.** Flow cytometric analysis of antigens CD34, CD45, CD73, and CD90. Negative control: CD34 and CD45; Positive control: CD73 and CD90. (A) Normal MSCs, (B) *Lmna*<sup>Dhe/+</sup> mutation MSCs.
